# Supplementary material for: Persistent organic room temperature phosphorescence: what is the role of molecular dimers?
Source: PubMed Central journal article supplement — Chem Sci. 2019 Nov 25;11(3):833–8. doi: 10.1039/c9sc04632a (PMC8146318; doi:10.1039/c9sc04632a), 2019-11-25
Supplement: SC-011-C9SC04632A-s002.pdf [file SC-011-C9SC04632A-s002.pdf]

## Electronic Supporting Information

### Persistent organic room temperature phosphorescence: What is the role of molecular dimers?

Yunsheng Wang,<sup>a</sup> Jie Yang,<sup>\*a</sup> Yu Tian,<sup>a</sup> Manman Fang,<sup>a</sup> Qiuyan Liao,<sup>b</sup> Liwei Wang,<sup>a</sup> Wenping Hu,<sup>a</sup> Ben Zhong Tang,<sup>\*ac</sup> and Zhen Li<sup>\*abd</sup>

#### Synthesis

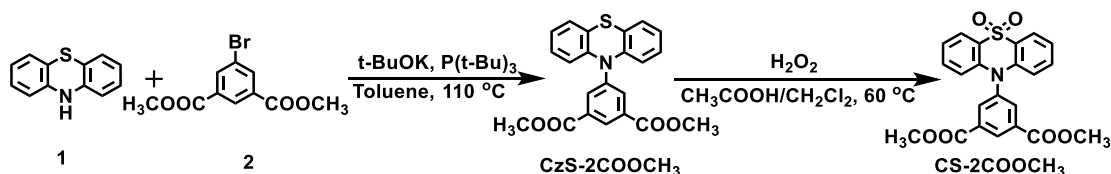

**Scheme S1** The synthetic route of compound CS-2COOCH<sub>3</sub>.

**CzS-2COOCH<sub>3</sub>:** Compound 1 (1.99 g, 10 mmol), compound 2 (3.28 g, 12 mol), potassium tert-butoxide (1.68 g, 15 mmol), palladium acetate (0.11 g, 0.5 mmol) and tri-tert-butylphosphine in toluene solution (0.5 mL, 0.25 mmol) were dissolved in toluene (100 mL) in a Schlenk tube.<sup>1</sup> The resultant mixture was refluxed for 12 hours under argon, then extracted with dichloromethane. The combined organic extracts were dried over anhydrous Na<sub>2</sub>SO<sub>4</sub> and concentrated by rotary evaporation. The crude product was purified by column chromatography on silica gel using petroleum ether/dichloromethane (v/v = 2:1) as eluent to afford a light yellow solid in a yield of 35%. <sup>1</sup>H-NMR (400 MHz, CDCl<sub>3</sub>) δ (ppm): 8.70 (s, 1H, ArH), 8.23 (s, 2H, ArH), 7.12-7.14 (d, 2H, ArH), 6.91-6.96 (m, 4H, ArH), 6.34-6.36 (d, 2H, ArH), 3.95 (s, 6H, -CH<sub>3</sub>); <sup>13</sup>C-NMR (100 MHz, CDCl<sub>3</sub>) δ (ppm): 165.6, 143.2, 142.6, 134.0, 133.1, 129.1, 127.4, 127.1, 123.6, 123.3, 118.0, 52.6. HRMS (EI), m/z: [M+Na]<sup>+</sup>, calcd. for C<sub>22</sub>H<sub>17</sub>NNaO<sub>4</sub>S, 414.0776; found, 414.0750. Anal. Calcd for C<sub>22</sub>H<sub>17</sub>NO<sub>4</sub>S: C, 67.50; H, 4.38; N, 3.58. Found: C, 67.48; H, 4.46; N, 3.40.

**CS-2COOCH<sub>3</sub>:** Compound CzS-2COOCH<sub>3</sub> was dissolved in dichloromethane (90 mL), acetic acid (45 mL) and H<sub>2</sub>O<sub>2</sub> (2 mL). After reacting for another 24 hours at 60 °C, the reaction mixture was extracted with dichloromethane and further purified by column chromatography using petroleum ether/ethyl acetate (v/v = 5:1) as eluent to afford a white solid in a yield of 90%. <sup>1</sup>H-NMR (400 MHz, CDCl<sub>3</sub>) δ (ppm): 8.95 (s, 1H, ArH), 8.30 (s, 2H, ArH), 8.19-8.21 (d, 2H, ArH), 7.39-7.43 (t, 2H, ArH), 7.27-7.31 (t, 2H, ArH), 6.52-6.54 (d, 2H, ArH), 3.99 (s, 6H, -CH<sub>3</sub>); <sup>13</sup>C-NMR (100 MHz, CDCl<sub>3</sub>) δ (ppm): 164.8, 140.4, 139.5, 136.2, 134.2, 133.0, 131.8, 123.7, 123.2, 122.6, 116.9, 52.9; HRMS (EI), m/z: [M+Na]<sup>+</sup>, calcd. for C<sub>22</sub>H<sub>17</sub>NNaO<sub>6</sub>S, 446.0674; found, 446.0681. Anal. calcd for C<sub>22</sub>H<sub>17</sub>NO<sub>6</sub>S: C, 62.40; H, 4.05; N, 3.31. Found: C, 62.58; H, 4.24; N, 3.15.

#### Characterization

<sup>1</sup>H NMR spectra and <sup>13</sup>C NMR spectra were recorded on a 400 MHz Bruker AVANCE III spectrometer. Elemental analyses of carbon, hydrogen and nitrogen were measured on a vario EL cube. High resolution mass spectrum was measured on a UHPLC/Q-TOF MS. High-performance liquid chromatogram spectrum was recorded on Agilent 1100 HPLC. UV-vis spectra were measured on a Shimadzu UV-2700. Photoluminescence spectra and excitation spectra were performed on a Hitachi F-4600 fluorescence

spectrophotometer. The powder X-ray diffraction patterns were recorded by Rigaku Smartlab9KW. The single-crystal X-ray diffraction data of CS-2COOCH<sub>3</sub> were collected in XtaLAB SuperNova X-ray diffractometer. Fluorescence quantum yields and lifetimes were determined with FLS980 spectrometer.

The Gaussian 09 program was utilized to perform the TD-DFT calculations. The ground state (S<sub>0</sub>) geometries were obtained from the single crystal structure and no further geometry optimization was conducted in order to maintain the specific molecular configurations and corresponding intermolecular locations. The natural transition orbit (NTO) of T<sub>1</sub> state and HOMO/LUMO of CS-2COOCH<sub>3</sub> were evaluated by the TD-b3lyp/6-31g\*.

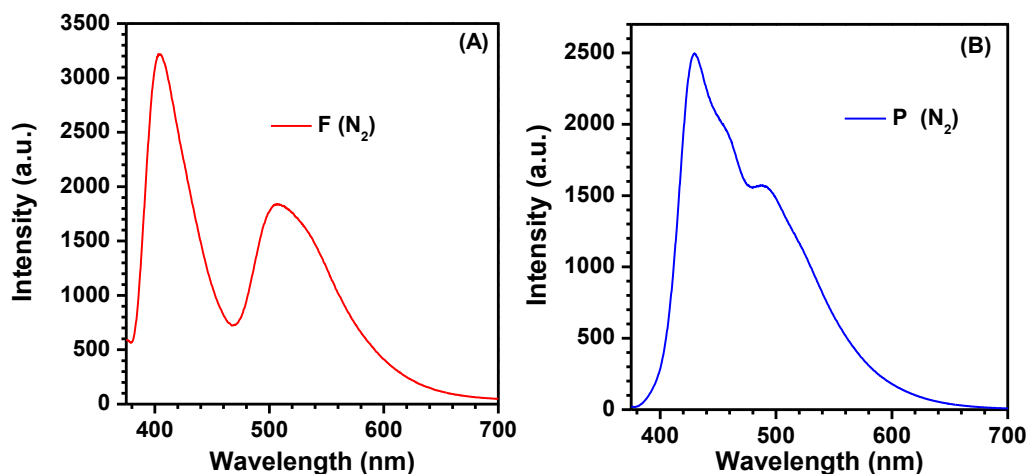

**Figure S1** (A) The steady state PL spectra of CS-2COOCH<sub>3</sub> crystal under N<sub>2</sub> atmosphere; (B) The RTP spectrum, acquired after 10 ms delay, of CS-2COOCH<sub>3</sub> crystal under N<sub>2</sub> atmosphere.

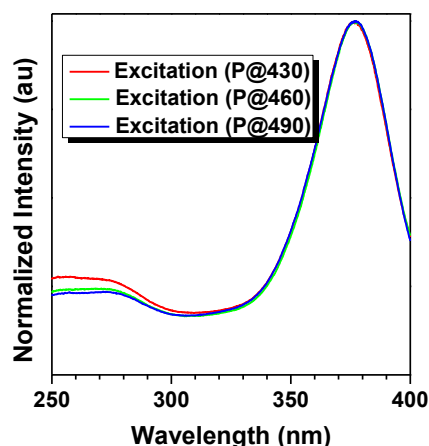

**Figure S2** The excitation spectra of room temperature phosphorescence at 430, 460 and 490 nm.

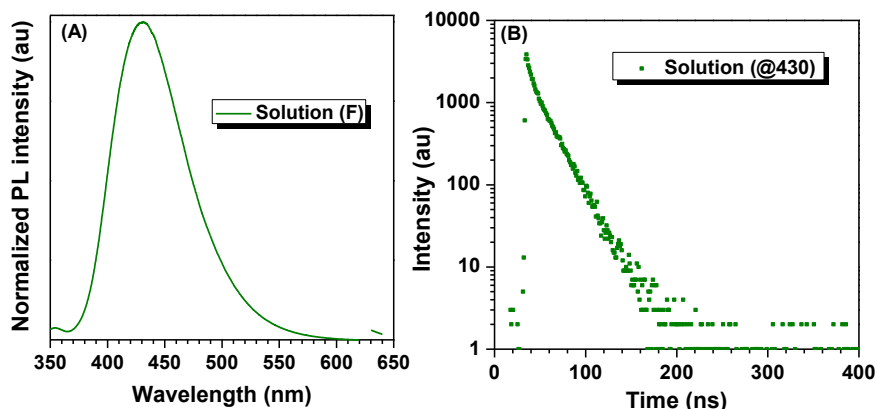

**Figure S3** (A) The normalized PL spectrum of CS-2COOCH<sub>3</sub> in THF solution; (B) The PL decay curve of CS-2COOCH<sub>3</sub> in THF solution.

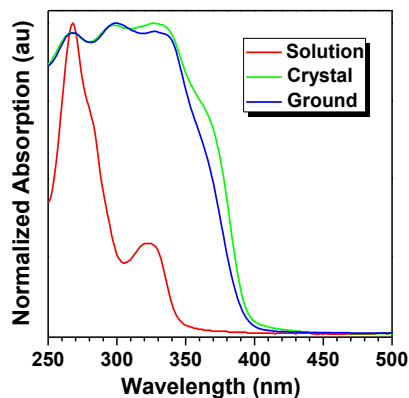

**Figure S4** The UV-vis absorption spectra of CS-2COOCH<sub>3</sub> in different states, including THF solution, crystal and ground states.

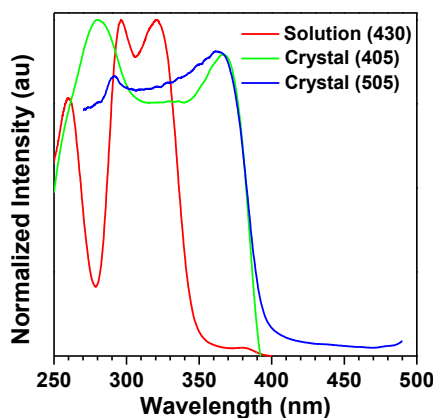

**Figure S5** The normalized excitation spectra of CS-2COOCH<sub>3</sub> in THF solution and crystal states.

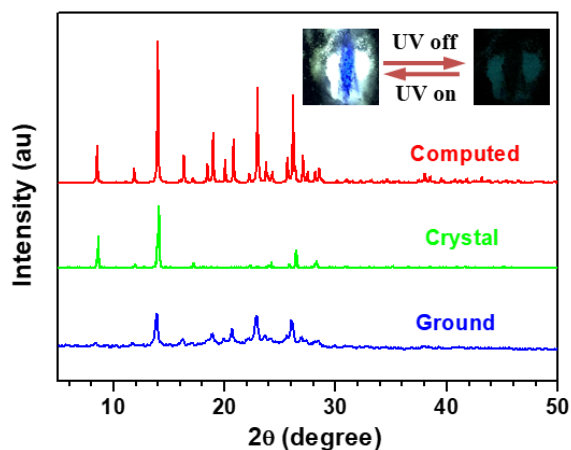

**Figure S6** The computed XRD data (as derived from X-ray crystallography) and powder X-ray diffraction (PXRD) of CS-2COOCH<sub>3</sub> in crystal and ground states. Inset: the photo of CS-2COOCH<sub>3</sub> before and after turning off the 365 nm UV-irradiation, in which the CS-2COOCH<sub>3</sub> crystal is RTP active while the ground one is RTP non-active.

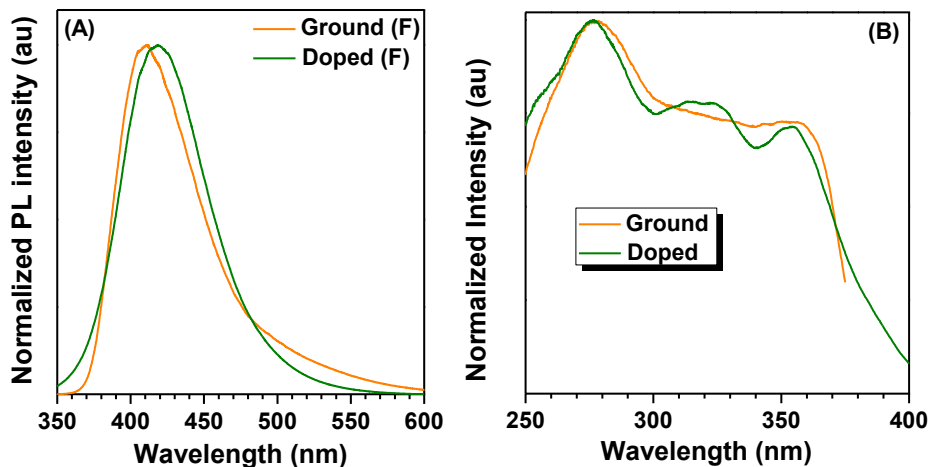

**Figure S7** (A) The normalized PL spectra of CS-2COOCH<sub>3</sub> in ground state and doped in PMMA film; (B) The corresponding excitation spectra of CS-2COOCH<sub>3</sub> in ground state and doped in PMMA film.

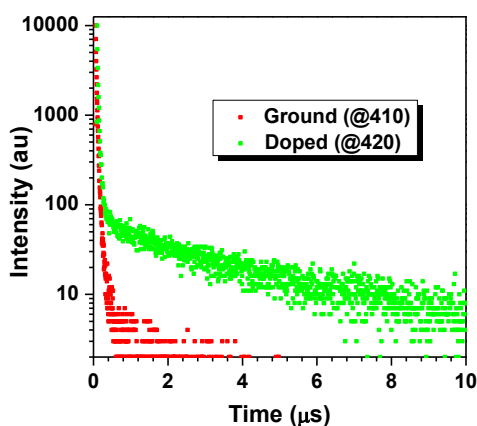

**Figure S8** The PL decay curves of CS-2COOCH<sub>3</sub> in ground state and doped in PMMA film.

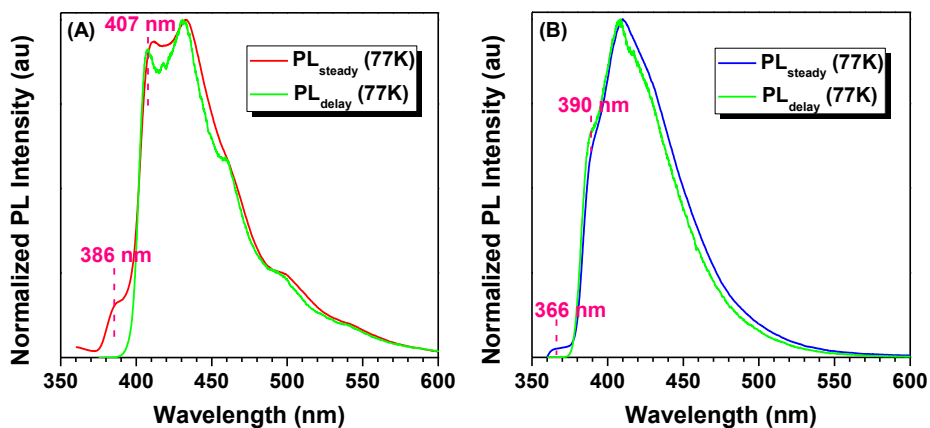

**Figure S9** (A) The steady state PL spectrum and the delayed (10 ms) one of CS-2COOCH<sub>3</sub> crystal at 77 K; (B) The steady state PL spectrum and the delayed (10 ms) one at 77 K, when CS-2COOCH<sub>3</sub> was doped in PMMA film with mass fraction about 5%.

**Table S1** Structure data of single crystals of CzS-2COOCH<sub>3</sub> and CS-2COOCH<sub>3</sub>.

|                               |                                                   |                                                   |
|-------------------------------|---------------------------------------------------|---------------------------------------------------|
| Name                          | CzS-2COOCH <sub>3</sub>                           | CS-2COOCH <sub>3</sub>                            |
| Formula                       | C <sub>22</sub> H <sub>17</sub> NO <sub>4</sub> S | C <sub>22</sub> H <sub>17</sub> NO <sub>6</sub> S |
| Wavelength (Å)                | 1.54184                                           | 1.54184                                           |
| Space Group                   | P n m a                                           | P 21 21 21                                        |
| Cell Lengths (Å)              | a=6.6807(2)<br>b=19.9408(7)<br>c=14.2683(4)       | a=5.76005(7)<br>b=15.96476(18)<br>c=20.7187(2)    |
| Cell Angles (o)               | α=90<br>β=90<br>γ=90                              | α=90<br>β=90<br>γ=90                              |
| Cell Volume (Å <sup>3</sup> ) | 1900.80(10)                                       | 1905.25(4)                                        |
| Z                             | 4                                                 | 4                                                 |
| Density (g/cm <sup>3</sup> )  | 1.368                                             | 1.476                                             |
| F(000)                        | 816                                               | 880                                               |
| hmax, kmax, lmax              | 7,23,17                                           | 6,19,24                                           |
| CCDC Number                   | 1963173                                           | 1944189                                           |

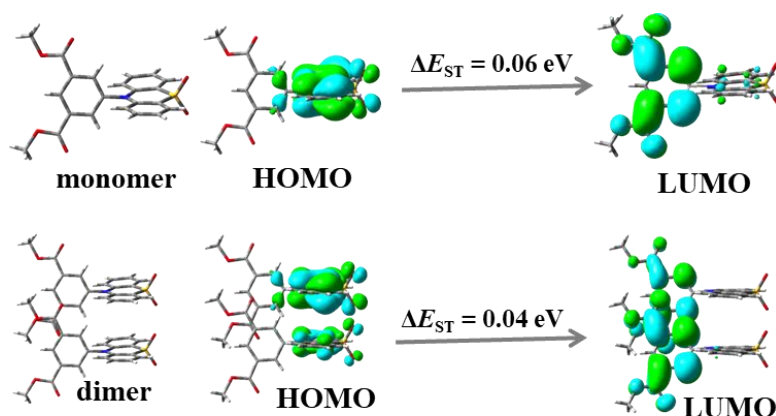**Figure S10** The HOMO and LUMO electron cloud distributions of CS-2COOCH<sub>3</sub> in monomer and dimer.**Table S2** The calculated fluorescence radiation rate and non-radiation rate of CS-2COOCH<sub>3</sub> in different states.

| state   | emission       | $\Phi_F$ | $\tau_F$     | $k_r$                 | $k_{nr}$             |
|---------|----------------|----------|--------------|-----------------------|----------------------|
| doped   | @420 nm        | 10.40%   | 0.97 $\mu$ s | $10.72 \cdot 10^4$ /s | $9.24 \cdot 10^5$ /s |
|         | monomer@405 nm | 3.34%    | 1.27 $\mu$ s | $2.63 \cdot 10^4$ /s  | $7.61 \cdot 10^5$ /s |
| Crystal | excimer@505 nm | 4.62%    | 10.6 $\mu$ s | $0.44 \cdot 10^4$ /s  | $0.90 \cdot 10^5$ /s |

The radiation rate and non-radiation rate were estimated by the two equations below:

$$\Phi_F \approx k_r / (k_r + k_{nr}); \tau_F \approx 1 / (k_r + k_{nr})$$

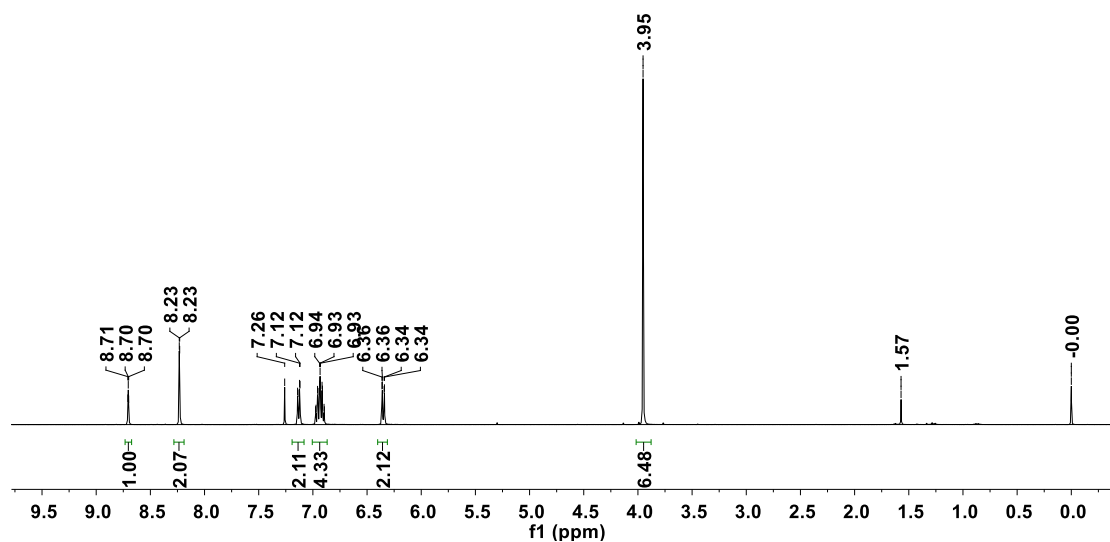

Figure S11 The  $^1\text{H}$  NMR spectrum of CzS-2COOCH<sub>3</sub>.

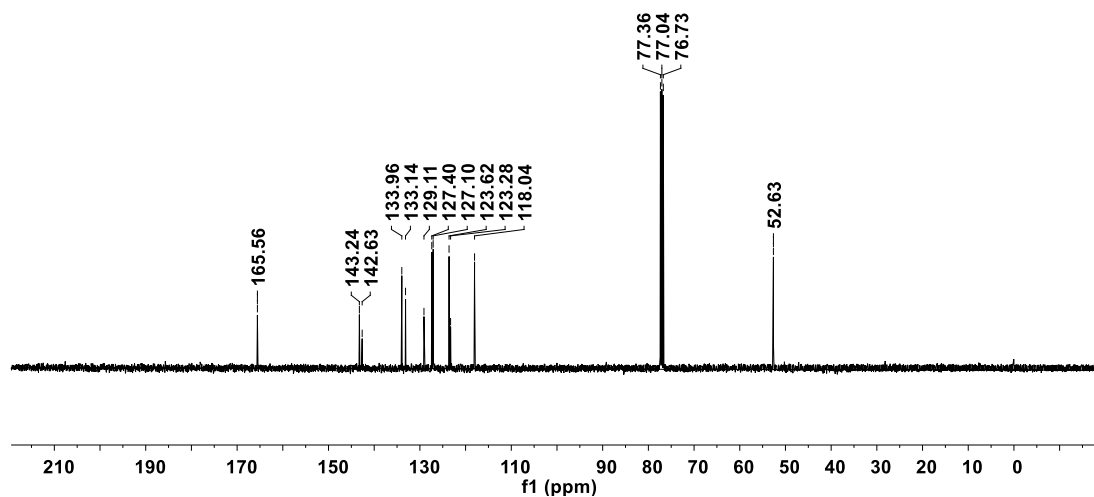

Figure S12 The  $^{13}\text{C}$  NMR spectrum of CzS-2COOCH<sub>3</sub>.

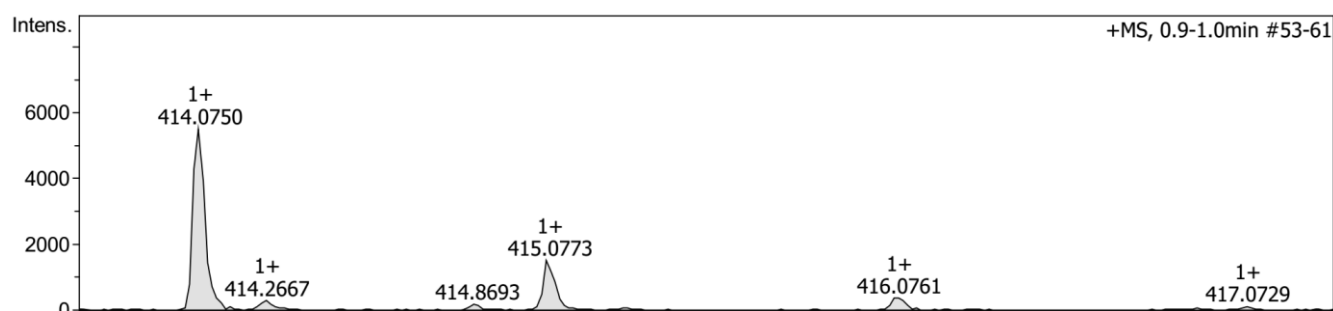

Figure S13 The HRMS spectrum of CzS-2COOCH<sub>3</sub>.

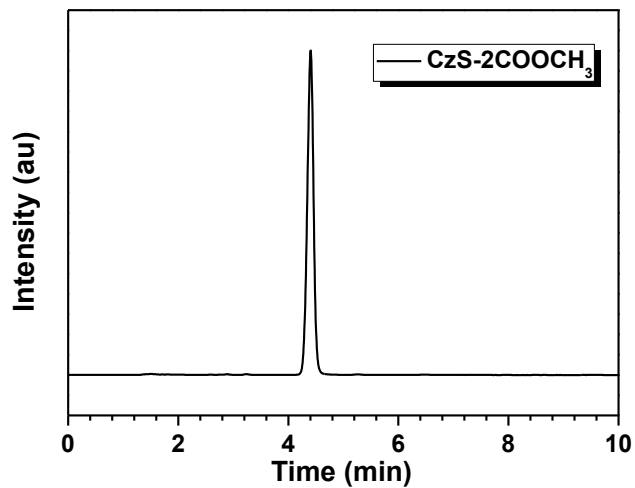

Figure S14 The HPLC spectrum of CzS-2COOCH<sub>3</sub>.

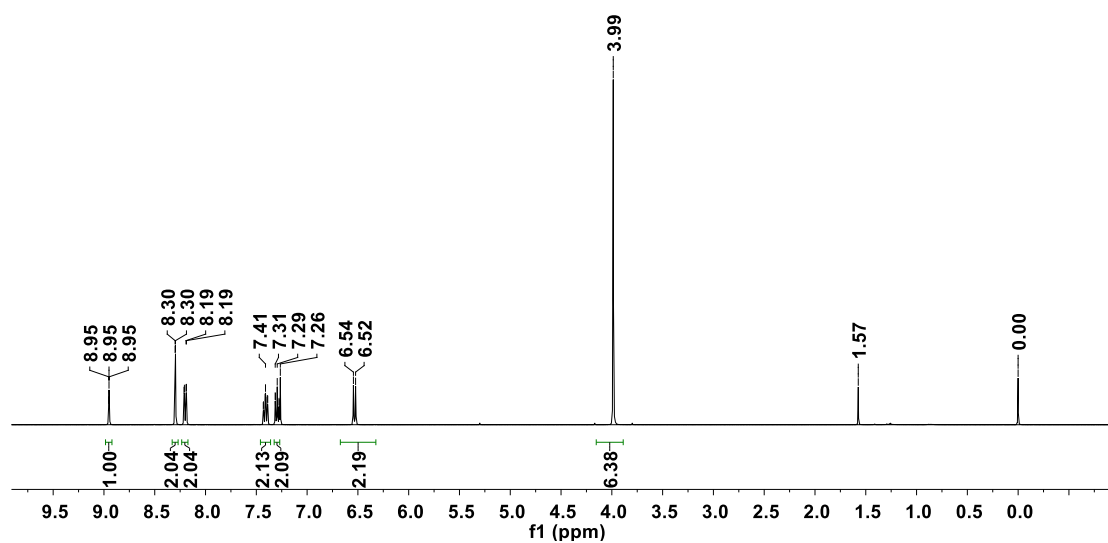

Figure S15 The <sup>1</sup>H NMR spectrum of CS-2COOCH<sub>3</sub>.

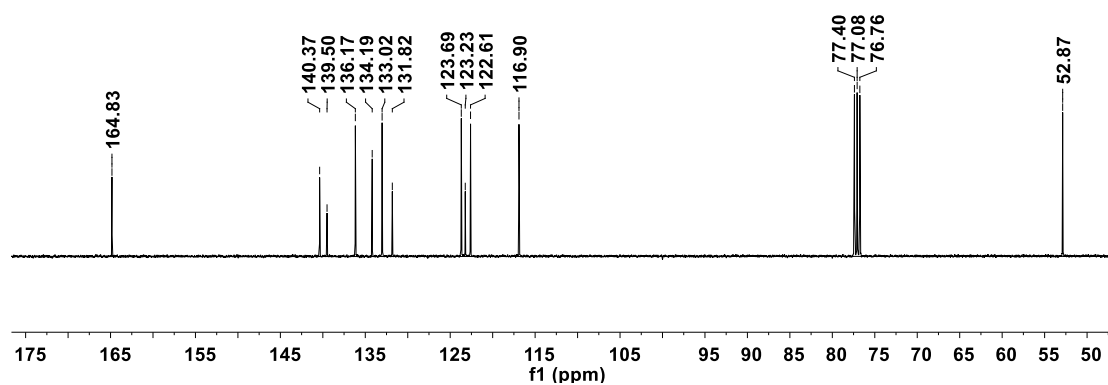

Figure S16 The <sup>13</sup>C NMR spectrum of CS-2COOCH<sub>3</sub>.

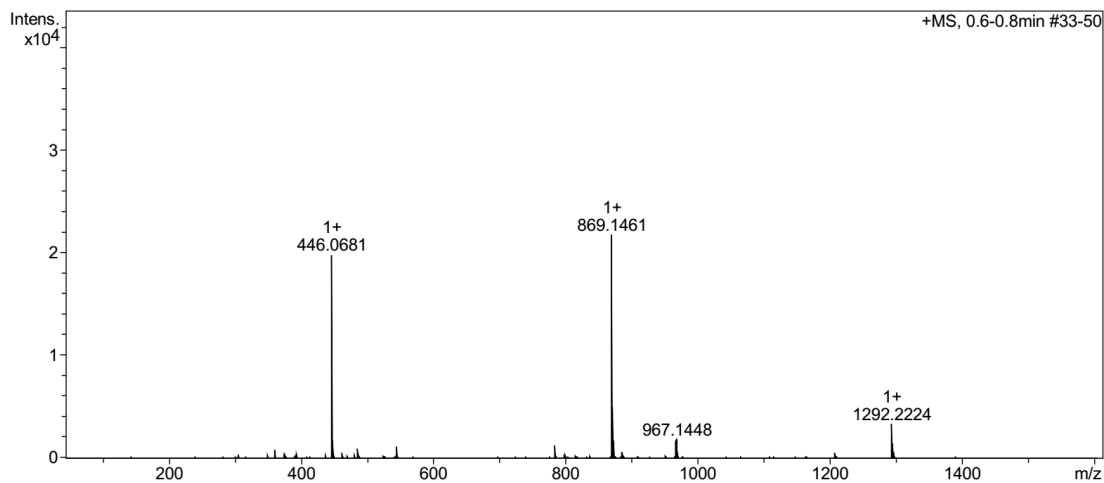

**Figure S17** The HRMS spectrum of CS-2COOCH<sub>3</sub>.

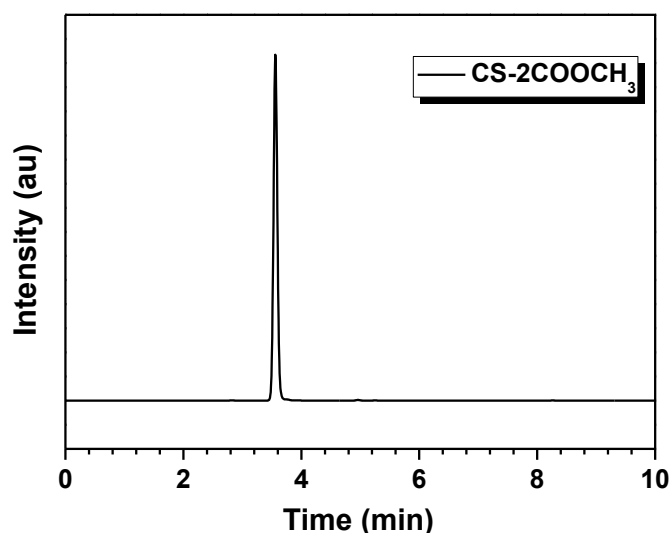

**Figure S18** The HPLC spectrum of CS-2COOCH<sub>3</sub>.

**Table S3** The atomic coordinates for CS-2COOCH<sub>3</sub> monomer

|   |            |             |            |
|---|------------|-------------|------------|
| O | 5.29790000 | 10.16980000 | 5.89890000 |
| O | 4.17730000 | 11.08080000 | 7.60550000 |
| C | 5.09400000 | 11.09060000 | 6.83860000 |
| H | 5.50040000 | 13.02670000 | 8.52160000 |
| H | 5.32850000 | 15.59230000 | 7.05960000 |
| C | 4.31200000 | 9.11250000  | 5.83430000 |
| H | 4.19420000 | 8.73060000  | 6.70750000 |
| H | 4.61050000 | 8.43440000  | 5.22480000 |
| H | 3.47620000 | 9.47310000  | 5.52720000 |
| C | 6.15040000 | 12.15170000 | 6.81190000 |
| C | 7.11020000 | 12.23810000 | 5.81420000 |
| C | 6.13550000 | 13.08880000 | 7.84490000 |
| C | 8.04060000 | 13.27320000 | 5.83340000 |
| H | 7.13210000 | 11.60460000 | 5.13370000 |
| C | 7.06470000 | 14.10640000 | 7.85900000 |
| C | 9.12720000 | 13.40680000 | 4.81890000 |
| C | 8.00320000 | 14.21540000 | 6.85230000 |
| N | 7.05900000 | 15.07450000 | 8.93210000 |



|   |             |             |             |
|---|-------------|-------------|-------------|
| O | 9.19340000  | 12.33990000 | 4.02490000  |
| O | 9.86800000  | 14.35340000 | 4.75510000  |
| H | 8.61040000  | 14.92040000 | 6.85670000  |
| C | 8.02680000  | 14.94130000 | 9.93210000  |
| C | 6.18900000  | 16.16420000 | 8.81220000  |
| C | 10.21770000 | 12.37180000 | 3.01190000  |
| C | 8.20370000  | 15.88550000 | 10.95080000 |
| C | 8.87710000  | 13.82090000 | 9.94080000  |
| C | 6.14350000  | 17.20110000 | 9.75130000  |
| C | 5.32030000  | 16.25740000 | 7.70920000  |
| H | 11.05250000 | 12.63270000 | 3.40870000  |
| H | 9.97570000  | 13.00470000 | 2.33180000  |
| H | 10.30760000 | 11.49920000 | 2.61970000  |
| S | 7.20260000  | 17.29790000 | 11.12930000 |
| C | 9.21010000  | 15.73670000 | 11.90730000 |
| H | 8.77630000  | 13.16110000 | 9.29200000  |
| C | 9.85590000  | 13.69130000 | 10.89860000 |
| C | 5.26320000  | 18.27380000 | 9.60200000  |
| C | 4.45730000  | 17.32690000 | 7.58100000  |
| O | 6.44080000  | 17.18100000 | 12.34260000 |
| O | 8.00550000  | 18.47920000 | 11.00580000 |
| C | 10.04200000 | 14.64310000 | 11.88270000 |
| H | 9.31840000  | 16.38280000 | 12.56600000 |
| H | 10.40720000 | 12.94240000 | 10.88240000 |
| H | 5.25120000  | 18.95150000 | 10.23840000 |
| C | 4.41640000  | 18.33630000 | 8.52450000  |
| H | 3.89160000  | 17.36940000 | 6.84420000  |
| H | 10.71660000 | 14.54530000 | 12.51630000 |
| H | 3.82420000  | 19.04720000 | 8.43050000  |

**Table S4** The atomic coordinates for CS-2COOCH<sub>3</sub> dimer

|   |            |             |             |
|---|------------|-------------|-------------|
| O | 5.29790000 | 10.16980000 | 5.89890000  |
| O | 3.43250000 | 12.33970000 | 4.02490000  |
| O | 4.17730000 | 11.08080000 | 7.60550000  |
| N | 1.29780000 | 15.07490000 | 8.93210000  |
| O | 4.10700000 | 14.35380000 | 4.75510000  |
| C | 2.26590000 | 14.94140000 | 9.93210000  |
| C | 2.27960000 | 13.27320000 | 5.83340000  |
| C | 1.30380000 | 14.10630000 | 7.85900000  |
| C | 0.38960000 | 12.15170000 | 6.81190000  |
| C | 2.44270000 | 15.88560000 | 10.95080000 |
| C | 1.34920000 | 12.23840000 | 5.81420000  |
| H | 1.37100000 | 11.60510000 | 5.13370000  |
| C | 5.09400000 | 11.09060000 | 6.83860000  |
| C | 3.11610000 | 13.82080000 | 9.94080000  |
| H | 3.01520000 | 13.16120000 | 9.29200000  |
| C | 0.37450000 | 13.08910000 | 7.84490000  |

|   |             |             |             |
|---|-------------|-------------|-------------|
| H | 5.50040000  | 13.02670000 | 8.52160000  |
| C | 3.36610000  | 13.40670000 | 4.81890000  |
| C | 2.24230000  | 14.21550000 | 6.85230000  |
| H | 2.84960000  | 14.91990000 | 6.85670000  |
| H | 5.32850000  | 15.59230000 | 7.05960000  |
| C | 4.28100000  | 14.64320000 | 11.88270000 |
| H | 4.95580000  | 14.54480000 | 12.51630000 |
| C | 3.44910000  | 15.73650000 | 11.90730000 |
| C | 4.09500000  | 13.69120000 | 10.89860000 |
| H | 4.64640000  | 12.94290000 | 10.88240000 |
| C | 4.45680000  | 12.37190000 | 3.01190000  |
| H | 5.29160000  | 12.63300000 | 3.40870000  |
| H | 4.21490000  | 13.00430000 | 2.33180000  |
| H | 4.54650000  | 11.49880000 | 2.61970000  |
| C | 4.31200000  | 9.11250000  | 5.83430000  |
| H | 4.19420000  | 8.73060000  | 6.70750000  |
| H | 4.61050000  | 8.43440000  | 5.22480000  |
| H | 3.47620000  | 9.47310000  | 5.52720000  |
| C | 0.42800000  | 16.16420000 | 8.81220000  |
| C | 0.38250000  | 17.20110000 | 9.75130000  |
| C | -0.44070000 | 16.25740000 | 7.70920000  |
| S | 1.44160000  | 17.29790000 | 11.12930000 |
| C | -0.49780000 | 18.27380000 | 9.60200000  |
| H | -0.43270000 | 15.59250000 | 7.05960000  |
| C | -1.30370000 | 17.32690000 | 7.58100000  |
| O | 0.67980000  | 17.18100000 | 12.34260000 |
| O | 2.24450000  | 18.47920000 | 11.00580000 |
| H | -0.50980000 | 18.95150000 | 10.23840000 |
| C | -1.34460000 | 18.33630000 | 8.52450000  |
| H | -1.86940000 | 17.36940000 | 6.84420000  |
| H | -1.93680000 | 19.04720000 | 8.43050000  |
| C | -0.66710000 | 11.09070000 | 6.83860000  |
| O | -0.46320000 | 10.17000000 | 5.89890000  |
| O | -1.58370000 | 11.08100000 | 7.60550000  |
| C | -1.44890000 | 9.11290000  | 5.83430000  |
| H | -1.56700000 | 8.73100000  | 6.70750000  |
| H | -1.15050000 | 8.43400000  | 5.22480000  |
| H | -2.28480000 | 9.47330000  | 5.52720000  |
| C | 6.15040000  | 12.15170000 | 6.81190000  |
| C | 7.11020000  | 12.23810000 | 5.81420000  |
| C | 6.13550000  | 13.08880000 | 7.84490000  |
| C | 8.04060000  | 13.27320000 | 5.83340000  |
| H | 7.13210000  | 11.60460000 | 5.13370000  |
| C | 7.06470000  | 14.10640000 | 7.85900000  |
| C | 9.12720000  | 13.40680000 | 4.81890000  |
| C | 8.00320000  | 14.21540000 | 6.85230000  |
| N | 7.05900000  | 15.07450000 | 8.93210000  |
| O | 9.19340000  | 12.33990000 | 4.02490000  |

|   |             |             |             |
|---|-------------|-------------|-------------|
| O | 9.86800000  | 14.35340000 | 4.75510000  |
| H | 8.61040000  | 14.92040000 | 6.85670000  |
| C | 8.02680000  | 14.94130000 | 9.93210000  |
| C | 6.18900000  | 16.16420000 | 8.81220000  |
| C | 10.21770000 | 12.37180000 | 3.01190000  |
| C | 8.20370000  | 15.88550000 | 10.95080000 |
| C | 8.87710000  | 13.82090000 | 9.94080000  |
| C | 6.14350000  | 17.20110000 | 9.75130000  |
| C | 5.32030000  | 16.25740000 | 7.70920000  |
| H | 11.05250000 | 12.63270000 | 3.40870000  |
| H | 9.97570000  | 13.00470000 | 2.33180000  |
| H | 10.30760000 | 11.49920000 | 2.61970000  |
| S | 7.20260000  | 17.29790000 | 11.12930000 |
| C | 9.21010000  | 15.73670000 | 11.90730000 |
| H | 8.77630000  | 13.16110000 | 9.29200000  |
| C | 9.85590000  | 13.69130000 | 10.89860000 |
| C | 5.26320000  | 18.27380000 | 9.60200000  |
| C | 4.45730000  | 17.32690000 | 7.58100000  |
| O | 6.44080000  | 17.18100000 | 12.34260000 |
| O | 8.00550000  | 18.47920000 | 11.00580000 |
| C | 10.04200000 | 14.64310000 | 11.88270000 |
| H | 9.31840000  | 16.38280000 | 12.56600000 |
| H | 10.40720000 | 12.94240000 | 10.88240000 |
| H | 5.25120000  | 18.95150000 | 10.23840000 |
| C | 4.41640000  | 18.33630000 | 8.52450000  |
| H | 3.89160000  | 17.36940000 | 6.84420000  |
| H | 10.71660000 | 14.54530000 | 12.51630000 |
| H | 3.82420000  | 19.04720000 | 8.43050000  |
| H | -0.26040000 | 13.02700000 | 8.52160000  |
| H | 3.55740000  | 16.38280000 | 12.56600000 |

## Reference

- (1) (a) X. Ding, C. Chen, L. Sun, H. Li, H. Chen, J. Su, H. Li, H. Li, L. Xu and M. Cheng, *J. Mater. Chem. A*, 2019, **7**, 9510-9516; (b) J. Yang, X. Zhen, B. Wang, X. Gao, Z. Ren, J. Wang, Y. Xie, J. Li, Q. Peng, K. Pu and Z. Li, *Nat. Commun.*, 2018, **9**, 840.
